# Supplementary material for: Management of perimesencephalic nonaneurysmal subarachnoid hemorrhage: a national survey
Source: PubMed Central journal article supplement (PMC10406943; doi:10.1038/s41598-023-39195-2), 2023-08-07
Supplement: 41598_2023_39195_MOESM1_ESM.pdf [file 41598_2023_39195_MOESM1_ESM.pdf]

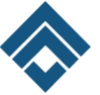

**Survey non-aneurysmal, non-traumatic SAH**

**A) How many cases of non-aneurysmal / non-traumatic SAH are treated in your hospital per year?**

- a) <5
- b) 5-10
- c) 10-20
- d) 20-50
- e) No information

**B) In how many cases do you diagnose cerebral vasospasm / vasospasm related complications with the need for further treatment?**

- a) <2%
- b) 2-5%
- c) 5-10%
- d) >10%
- e) We never diagnosed patients with non-aneurysmal / non-traumatic SAH with vasospasm or related complications

|   | <u>Case 1</u>                                                                                                          | <u>Case 2</u>                                                                       | <u>Case 3</u>                                                                          |
|---|------------------------------------------------------------------------------------------------------------------------|-------------------------------------------------------------------------------------|----------------------------------------------------------------------------------------|
|   |                                     |  |    |
|   | <p>38-year-old female,<br/>thunderclap headache,<br/>GCS 15, lumbar puncture<br/>positive for SAB<br/>Negative DSA</p> | <p>51-year-old male,<br/>headache for 2 days,<br/>GCS 15<br/>Negative DSA</p>       | <p>53-year-old male,<br/>thunderclap headache,<br/>emesis, GCS 15<br/>Negative DSA</p> |
| 1 |                                                                                                                        |                                                                                     |                                                                                        |
| 2 |                                                                                                                        |                                                                                     |                                                                                        |
| 3 |                                                                                                                        |                                                                                     |                                                                                        |
| 4 |                                                                                                                        |                                                                                     |                                                                                        |
| 5 |                                                                                                                        |                                                                                     |                                                                                        |

Please write your answer to the following questions in the table above

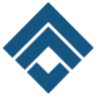

**1. What is your treatment regime?**

- a) Transfer to the Intensive care unit
- b) Transfer to intermediate care station
- c) Transfer to regular ward

**2. What is your treatment regime?**

- a) blood pressure monitoring (invasive)
- b) blood pressure monitoring ( non-invasive)
- c) No blood pressure monitoring

**3. What is your treatment regime?**

- a) cerebral vasospasm prophylaxis for 14 days with repetitive transcranial ultrasound
- b) cerebral vasospasm prophylaxis for 14 days without repetitive transcranial ultrasound
- c) No cerebral vasospasm prophylaxis but with repetitive transcranial ultrasound
- d) No cerebral vasospasm prophylaxis and without repetitive transcranial ultrasound

**4. When do you perform a second angiography in this case?**

- a) During hospital stay within the first 3 weeks after ictus
- b) 6-12 weeks after ictus
- c) 6 to 12 months after ictus
- d) We do not perform another DSA in this patient

**5. If the 2nd DSA is negative, do you opt for a third angiography in this case?**

- a) Yes
- b) No
